# Supplementary material
Source: Elsevier journal article supplement (https://www.sciencedirect.com/science/article/pii/S021391111830219X)
Supplement: mmc1 [file S021391111830219X:mmc1.docx]

# Apéndice

##

## **Tabla I**

## Detalle de las causas de mortalidad estudiadas codificadas según la CIE-10 30

|  | **Causa de mortalidad** | **Descripción** |
| --- | --- | --- |
| Y60 | Corte, punción, perforación o hemorragia no intencional durante la atención médica y quirúrgica | Incidente durante operación quirúrgica, infusión o transfusión, diálisis renal u otra perfusión, inyección o inmunización, examen endoscópico, cateterización cardíaca, aspiración, punción y otra cateterización, administración de enema, otras atenciones médicas y quirúrgicas o atención médica y quirúrgica no especificada |
| Y61 | Objeto extraño dejado accidentalmente en el cuerpo durante la atención médica y quirúrgica | Objeto extraño dejado accidentalmente en el cuerpo durante operación quirúrgica, infusión o transfusión, diálisis renal u otra perfusión, inyección o inmunización, examen endoscópico, cateterización cardíaca, aspiración, punción y otra cateterización, remoción de catéter o taponamiento, otras atenciones médicas y quirúrgicas o atención médica y quirúrgica no especificada |
| Y62 | Fallas en la esterilización durante la atención médica y quirúrgica | Fallas en la esterilización durante operación quirúrgica, infusión o transfusión, diálisis renal u otra perfusión, inyección o inmunización, examen endoscópico, cateterización cardíaca, aspiración, punción y otra cateterización, otras atenciones médicas y quirúrgicas o atención médica y quirúrgica no especificada |
| Y63 | Falla en la dosificación durante la atención médica y quirúrgica | Excesiva cantidad de sangre u otro líquido administrado durante una infusión o transfusión Dilución incorrecta de líquido durante una infusión Sobredosis de radiación administrada durante terapia Exposición inadvertida del paciente a radiación durante la atención médica Falla en la dosificación en electrochoque o en choque insulínico Falla en el control de la temperatura, en taponamientos y aplicaciones locales No administración de drogas, medicamentos o sustancias biológicas necesarias Falla en la dosificación durante otras atenciones médicas y quirúrgicas Falla en la dosificación durante atención médica y quirúrgica no especificada **Excluye: sobredosis accidental de droga, o droga equivocada administrada por error (X40–X44)** |
| Y64 | Medicamentos o sustancias biológicas contaminados | Medicamento o sustancia biológica contaminado en infusión o transfusión, inyectado o usado para inmunización, administrado por otros medios o por medios no especificados |
| Y65 | Otros incidentes durante la atención médica y quirúrgica | Sangre incompatible usada en transfusión Líquido erróneo usado en infusión Falla en la sutura o ligadura durante operación quirúrgica Tubo endotraqueal colocado erróneamente durante procedimiento anestésico Falla en la introducción o remoción de otro tubo o instrumento Realización de una operación inadecuada Otros incidentes especificados durante la atención médica y quirúrgica |
| Y66 | No administración de la atención médica y quirúrgica | No administración o suspensión prematura de la atención médica y quirúrgica |
| Y69 | Incidentes no especificados durante la atención médica y quirúrgica |  |
| Y83 | Cirugía y otros procedimientos quirúrgicos como la causa de reacción anormal del paciente o de complicación posterior, sin mención de incidente en el momento de efectuar el procedimiento | Operación quirúrgica con trasplante de un órgano completo, con implante de un dispositivo artificial interno, con anastomosis, derivación o injerto, con formación de estoma externo, otra cirugía reconstructiva, amputación de miembros, remoción de otro órgano (total o parcial), otros procedimientos quirúrgicos o procedimientos quirúrgicos no especificados **Excluye: incidentes ocurridos al paciente durante la atención médica y quirúrgica clasificables en Y60–Y69 (Y60–Y69) y rotura o malfuncionamiento de dispositivo médico (durante procedimiento) (después de su implantación) (en uso actual) (Y70–Y82)** |
| Y84 | Otros procedimientos médicos como la causa de reacción anormal del paciente o de complicación posterior, sin mención de incidente en el momento de efectuar el procedimiento | Cateterización cardíaca, diálisis renal, procedimiento radiológico y radioterapia, terapia por choque, aspiración de líquidos, inserción de sonda gástrica o duodenal, cateterización urinaria, muestra de sangre, otros procedimientos médicos, procedimiento médico no especificado **Excluye: incidentes ocurridos al paciente durante la atención médica y quirúrgica clasificables en Y60–Y69 (Y60–Y69) y rotura o malfuncionamiento de dispositivo médico (durante procedimiento) (después de su implantación) (en uso actual) (Y70–Y82)** |

## **Tabla II**

## Índice sintético de vulnerabilidad provincial 2006-2013

| **Provincia** | **Vulnerabilidad**  **inmobiliaria** | **Vulnerabilidad**  **económica** | **Vulnerabilidad**  **social** | **Índice sintético de**  **vulnerabilidad** |
| --- | --- | --- | --- | --- |
|
| Álava | -1.40 | 0.00 | -0.40 | -0.60 |
| Albacete | 0.20 | 0.20 | 1.00 | 0.47 |
| Alicante | 0.80 | 1.80 | -0.20 | 0.80 |
| Almería | 1.20 | 1.20 | 0.20 | 0.87 |
| Asturias | -0.20 | 0.40 | -1.20 | -0.33 |
| Ávila | 1.00 | 0.60 | 0.00 | 0.53 |
| Badajoz | -1.20 | -1.20 | -0.80 | -1.07 |
| Balears (Illes) | 0.20 | 0.80 | 0.40 | 0.47 |
| Barcelona | 1.00 | 0.80 | 0.40 | 0.73 |
| Burgos | 0.60 | 0.20 | 0.60 | 0.47 |
| Cáceres | -1.40 | -0.60 | 0.40 | -0.53 |
| Cádiz | 0.60 | 0.80 | 0.20 | 0.53 |
| Cantabria | 0.20 | 0.80 | -0.60 | 0.13 |
| Castellón | 1.40 | 2.00 | 0.40 | 1.27 |
| Ceuta | -1.20 | -0.40 | 0.40 | -0.40 |
| Ciudad Real | 0.60 | 0.20 | 0.60 | 0.47 |
| Córdoba | -0.20 | -0.40 | 0.60 | 0.00 |
| Coruña (A) | -0.20 | -1.00 | -0.20 | -0.47 |
| Cuenca | -0.20 | -0.40 | 0.40 | -0.07 |
| Girona | 0.80 | 0.60 | 0.40 | 0.60 |
| Granada | 0.20 | 0.20 | 0.20 | 0.20 |
| Guadalajara | 1.60 | 0.40 | -0.60 | 0.47 |
| Guipúzcoa | -2.00 | -0.60 | -1.00 | -1.20 |
| Huelva | 0.60 | -0.20 | -1.20 | -0.27 |
| Huesca | 0.60 | -0.60 | -0.40 | -0.13 |
| Jaén | 0.20 | -0.40 | 0.00 | -0.07 |
| León | 0.00 | -0.20 | 1.00 | 0.27 |
| Lleida | 1.40 | 0.80 | -0.20 | 0.67 |
| Lugo | -1.20 | -0.80 | -1.40 | -1.13 |
| Madrid | 0.20 | 0.20 | -0.40 | 0.00 |
| Málaga | 0.80 | 0.80 | 0.60 | 0.73 |
| Melilla | -0.60 | -1.00 | -0.40 | -0.67 |
| Murcia | 1.40 | 1.20 | 0.60 | 1.07 |
| Navarra | -1.20 | -0.20 | 0.00 | -0.47 |
| Ourense | -1.20 | -1.20 | -0.80 | -1.07 |
| Palencia | -1.00 | -0.60 | -1.20 | -0.93 |
| Palmas (Las) | 0.60 | 0.00 | -0.40 | 0.07 |
| Pontevedra | -0.20 | 0.20 | -0.80 | -0.27 |
| Rioja (La) | 0.80 | 0.60 | 0.20 | 0.53 |
| Salamanca | 0.00 | -1.00 | -0.20 | -0.40 |
| S.C. de Tenerife | 0.60 | 0.20 | -0.60 | 0.07 |
| Segovia | -0.40 | 1.20 | 0.40 | 0.40 |
| Sevilla | -0.20 | 0.20 | -1.00 | -0.33 |
| Soria | -1.60 | -0.40 | 0.40 | -0.53 |
| Tarragona | 1.20 | 1.20 | -0.20 | 0.73 |
| Teruel | -1.20 | -0.20 | 0.80 | -0.20 |
| Toledo | 1.20 | 2.00 | -0.60 | 0.87 |
| Valencia | 0.80 | 1.40 | 1.00 | 1.07 |
| Valladolid | 0.60 | -0.60 | 0.00 | 0.00 |
| Vizcaya | -1.80 | -0.40 | -0.40 | -0.87 |
| Zamora | -1.40 | -0.40 | -1.00 | -0.93 |
| Zaragoza | 0.40 | 1.40 | -0.20 | 0.53 |

Fuente: Méndez, et al. Atlas de la crisis. Impactos socioeconómicos y territorios vulnerables en España. Valencia: Tirant lo Blanch; 2015. p. 247. Reproducida con permiso del autor.
